# Supplementary material for: A Systematic Review on Cardiometabolic Risks and Perinatal Outcomes among Pregnant Women Living with HIV in the Era of Antiretroviral Therapy
Source: MDPI journal article supplement (doi:10.3390/v15071441), 2023-06-26
Supplement: s1 [file s1]

*Review*

# **A Systematic Review on Cardiometabolic Risks and Perinatal Outcomes among Pregnant Women Living with HIV in the Era of Antiretroviral Therapy**

**Perpetua Modjadji <sup>1,\*</sup>, Kabelo Mokgalaboni <sup>2</sup>, Engelbert Nonterah <sup>3</sup>, Sogolo Lucky Lebelo <sup>2</sup>, Zandile June-Rose Mchiza <sup>1</sup>, Sphiwe Madiba <sup>4</sup> and Andre Pascal Kengne <sup>1</sup>**

<sup>1</sup> Non-Communicable Diseases Research Unit, South African Medical Research Council, Tygerberg, Cape Town 7505, South Africa

<sup>2</sup> Department of Life and Consumer Sciences, College of Agriculture and Environmental Sciences, University of South Africa, Florida Campus, Johannesburg 1709, South Africa

<sup>3</sup> Navrongo Health Research Centre, Ghana Health Service, Navrongo P.O. Box 114, Ghana

<sup>4</sup> Faculty of Health Sciences, University of Limpopo, Polokwane 0700, South Africa

\* Correspondence: [perpetua.modjadji@mrc.ac.za](mailto:perpetua.modjadji@mrc.ac.za)

**Supplementary Table S1.** Search strategy on PubMed/MEDLINE.

| Term number            | MeSH terms                                                                                                                                                                                                                                                                                         | Number of records |
|------------------------|----------------------------------------------------------------------------------------------------------------------------------------------------------------------------------------------------------------------------------------------------------------------------------------------------|-------------------|
| 1                      | Pregnancy Outcome                                                                                                                                                                                                                                                                                  | 84,756            |
| 2                      | Pregnancy complications, infectious                                                                                                                                                                                                                                                                | 49,766            |
| 3                      | pregnancy complication                                                                                                                                                                                                                                                                             | 470,460           |
| 4                      | pregnancy characteristics                                                                                                                                                                                                                                                                          | 0                 |
| 5                      | pregnancy problem                                                                                                                                                                                                                                                                                  | 0                 |
| 6                      | HIV                                                                                                                                                                                                                                                                                                | 106,895           |
| 7                      | HIV infections                                                                                                                                                                                                                                                                                     | 312,850           |
| 8                      | HIV-1                                                                                                                                                                                                                                                                                              | 84,262            |
| 9                      | HIV-2                                                                                                                                                                                                                                                                                              | 4,322             |
| 10                     | AIDS                                                                                                                                                                                                                                                                                               | 78,302            |
| 11                     | Acquired Immunodeficiency Syndrome                                                                                                                                                                                                                                                                 | 78,302            |
| 12                     | Anti-HIV Agents                                                                                                                                                                                                                                                                                    | 59,275            |
| 13                     | HIV Protease Inhibitors                                                                                                                                                                                                                                                                            | 10,394            |
| 14                     | HIV Integrase Inhibitors                                                                                                                                                                                                                                                                           | 2,298             |
| 15                     | ARV                                                                                                                                                                                                                                                                                                | 0                 |
| 16                     | highly active antiretroviral therapy                                                                                                                                                                                                                                                               | 22,536            |
| 17                     | ART                                                                                                                                                                                                                                                                                                | 38,041            |
| 18                     | combination-ARV                                                                                                                                                                                                                                                                                    | 0                 |
| 19                     | combination-ART                                                                                                                                                                                                                                                                                    | 0                 |
| 20 (1,2,3,4, and 5)    | (((((Pregnancy Outcome[MeSH Terms]) OR (pregnancy complications, infectious[MeSH Terms])) OR (pregnancy complication[MeSH Terms])) OR (pregnancy characteristics[MeSH Terms])) OR (pregnancy characteristics[MeSH Terms])) OR (pregnancy problem[MeSH Terms])) OR (pregnancy problem[MeSH Terms])) | 492,919           |
| 21 (6,7,8,9,10 and 11) | (((((HIV[MeSH Terms]) OR (HIV infections[MeSH Terms])) OR (HIV-1[MeSH Terms])) OR (HIV-2[MeSH Terms])) OR (AIDS[MeSH Terms])) OR (Acquired                                                                                                                                                         | 347,641           |

|                                  |                                                                                                                                                                                                                                                                                                                                                                                                                                                                                                                                                                                                                             |         |
|----------------------------------|-----------------------------------------------------------------------------------------------------------------------------------------------------------------------------------------------------------------------------------------------------------------------------------------------------------------------------------------------------------------------------------------------------------------------------------------------------------------------------------------------------------------------------------------------------------------------------------------------------------------------------|---------|
|                                  | Immunodeficiency Syndrome[MeSH Terms])                                                                                                                                                                                                                                                                                                                                                                                                                                                                                                                                                                                      |         |
| 22 (12,13,14,15,16,17,18 and 19) | ((((((((Anti-HIV Agents[MeSH Terms]) OR (HIV Protease Inhibitors[MeSH Terms])) OR (HIV Integrase Inhibitors[MeSH Terms])) OR (ARV[MeSH Terms])) OR (ARV[MeSH Terms])) OR (highly active antiretroviral therapy[MeSH Terms])) OR (ART[MeSH Terms])) OR (combination-ARV[MeSH Terms])) OR (combination-ARV[MeSH Terms])) OR (combination-ART[MeSH Terms])                                                                                                                                                                                                                                                                     | 111,510 |
| 23 (20, 21 and 22)               | ((((((((Pregnancy Outcome[MeSH Terms]) OR (pregnancy complications, infectious[MeSH Terms])) OR (pregnancy complication[MeSH Terms])) OR (pregnancy characteristics[MeSH Terms])) OR (pregnancy characteristics[MeSH Terms])) OR (pregnancy problem[MeSH Terms])) OR (pregnancy problem[MeSH Terms])) AND (((((((HIV[MeSH Terms]) OR (HIV infections[MeSH Terms])) OR (HIV-1[MeSH Terms])) OR (HIV-2[MeSH Terms])) OR (AIDS[MeSH Terms])) OR (Acquired Immunodeficiency Syndrome[MeSH Terms])) AND (((((((Anti-HIV Agents[MeSH Terms]) OR (HIV Protease Inhibitors[MeSH Terms])) OR (HIV Integrase Inhibitors[MeSH Terms])) | 174     |

|  |                                                                                                                                                                                                                                                                                                                                                    |  |
|--|----------------------------------------------------------------------------------------------------------------------------------------------------------------------------------------------------------------------------------------------------------------------------------------------------------------------------------------------------|--|
|  | OR (ARV[MeSH Terms]))<br>OR (ARV[MeSH Terms]))<br>OR (highly active<br>antiretroviral therapy[MeSH<br>Terms])) OR (ART[MeSH<br>Terms])) OR (combination-<br>ARV[MeSH Terms])) OR<br>(combination-ARV[MeSH<br>Terms])) OR (combination-<br>ART[MeSH Terms])) Filters:<br>Free Full text, Clinical Trial,<br>Randomized Controlled<br>Trial, English |  |
|--|----------------------------------------------------------------------------------------------------------------------------------------------------------------------------------------------------------------------------------------------------------------------------------------------------------------------------------------------------|--|

**Supplementary Table S2.** Search strategy on Scopus.

| Search                                                                                                                                                                                                                                                                                | Records |
|---------------------------------------------------------------------------------------------------------------------------------------------------------------------------------------------------------------------------------------------------------------------------------------|---------|
| (TITLE-ABS-KEY (pregnancy AND<br>outcomes) OR TITLE-ABS-KEY (pregnancy AND complications ) AND<br>TITLE-ABS-KEY ( HIV ) OR TITLE-ABS-KEY ( aids ) AND TITLE-ABS-KEY ( art )<br>AND TITLE-ABS-KEY ( ARV) AND ( LIMIT-TO ( DOCTYPE , "ar" ) ) AND ( LIMIT-TO ( LANGUAGE , "English" ) ) | 58      |
